# Supplementary material for: Dynamic and Widespread lncRNA Expression in a Sponge and the Origin of Animal Complexity
Source: PubMed Central journal article supplement — Mol Biol Evol. 2015 May 14;32(9):2367–82. doi: 10.1093/molbev/msv117 (PMC4540969; doi:10.1093/molbev/msv117), 2015-05-14
Supplement: supp_msv117_Gaiti_et_al_Supplementary_Material.pdf [file supp_msv117_Gaiti_et_al_Supplementary_Material.pdf]

## **Supplementary Material for:**

“Dynamic and widespread lncRNA expression in the sponge and the origin of animal complexity”

**Authors:** Federico Gaiti, Selene L. Fernandez-Valverde, Nagayasu Nakanishi, Andrew D. Calcino, Itai Yanai, Milos Tanurdzic and Bernard M. Degnan

## **This PDF includes:**

Supplemental Figure 1

Supplemental Figure 2

Supplemental Figure 3

Supplemental Figure 4

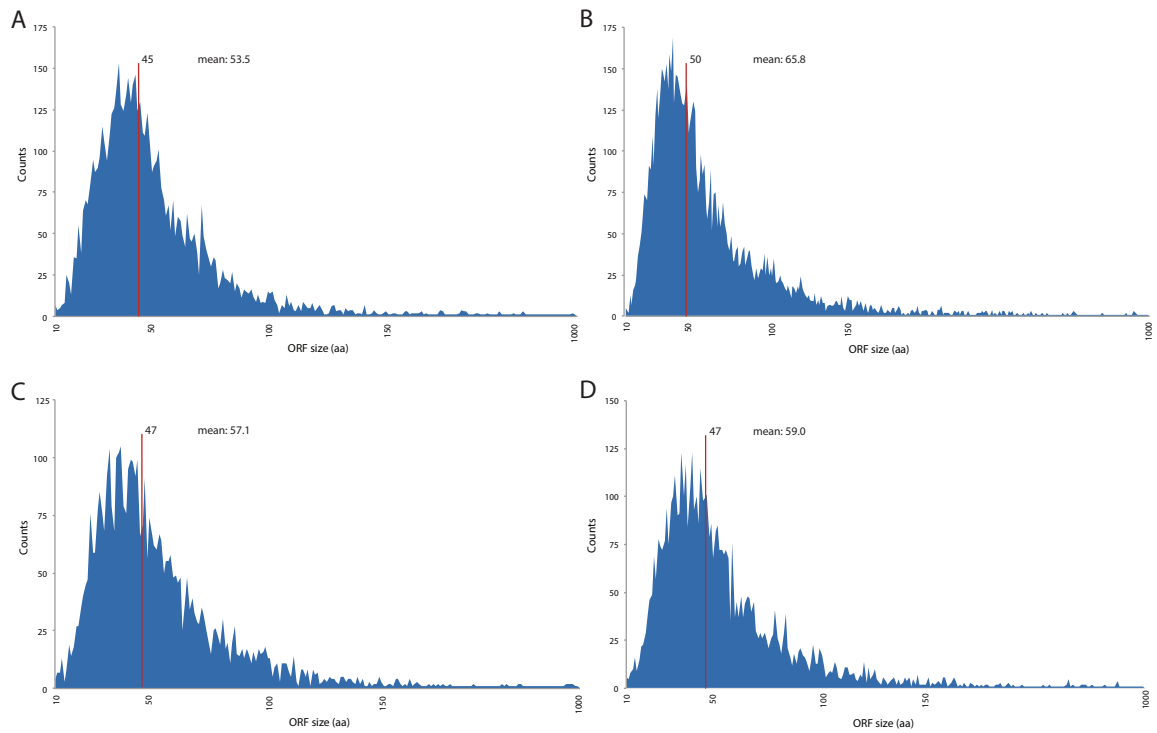

**Supplemental Figure 1** – Validation of ORF size cut-off. The distribution of open reading frame size (x-axis) for the set of putative lncRNAs in (A) the precompetent larva, (B) the competent larva, (C) the juvenile and (D) the adult, when no ORF size cut-off was imposed (>300 amino acids), is shown here. The median ORF size is shown as a vertical red line.

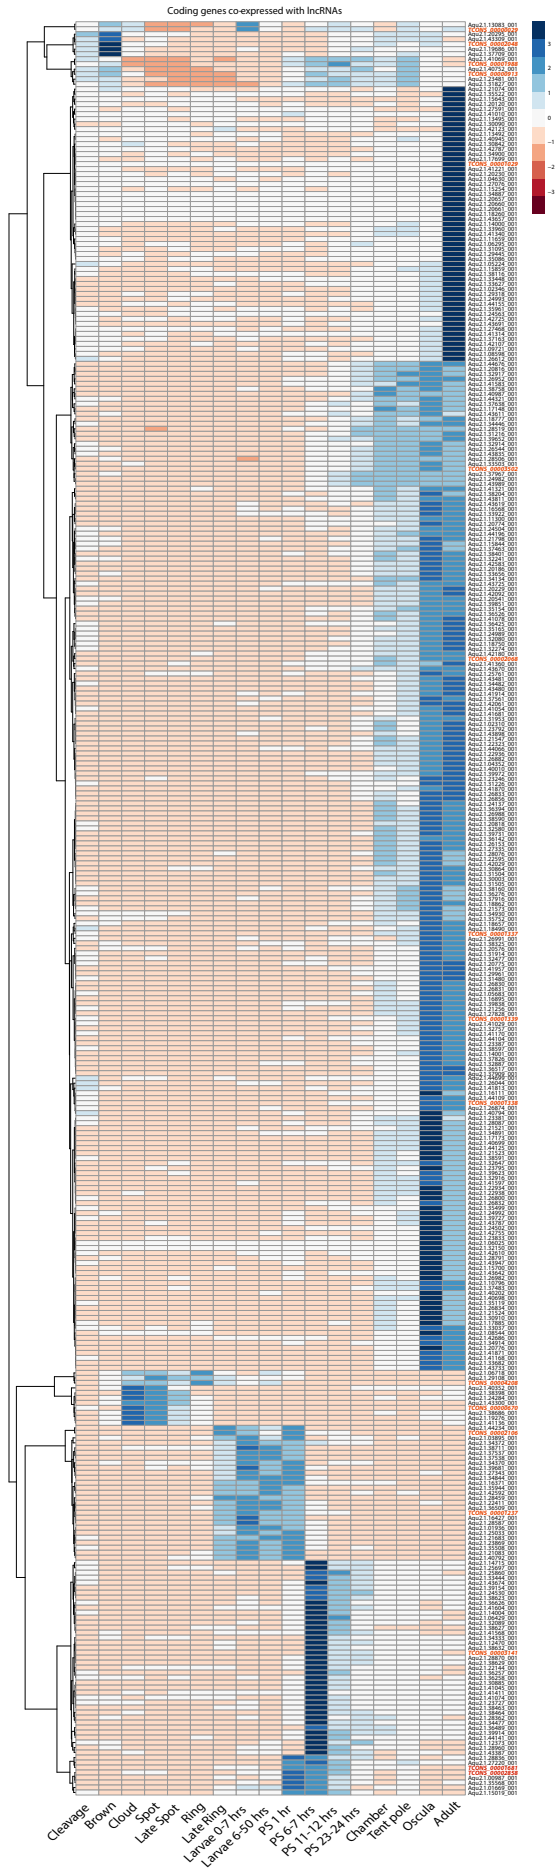

**Supplemental Figure 2** – Heatmap showing expression abundance of all protein-coding genes co-expressed with the differentially expressed lncRNAs (rows) across the whole *Amphimedon* developmental time course, from early cleavage to adult (columns). Expression levels (normalized counts) were measured by CEL-Seq and rescaled by row. Genes were clustered by hierarchical clustering. To reduce noise, the differentially expressed lncRNAs and protein-coding genes with an overall expression of less than 100 CEL-Seq normalized counts throughout the whole developmental time course were discarded. Pearson's correlation and a Fisher's exact test were then used to correlate the expression level of each differentially expressed lncRNA with the protein-coding genes, using R (R Development Core Team 2010). Only genes that showed more than 0.95 correlation (positive and negative) and a *p-value* <0.05 were considered to be co-expressed. Blue shows high expression, red shows low expression. lncRNAs are shown in red. The codes used for this gene co-expression analysis are available for download at:

[https://bitbucket.org/selene\\_fernandez/amphimedon-lncrnas](https://bitbucket.org/selene_fernandez/amphimedon-lncrnas).

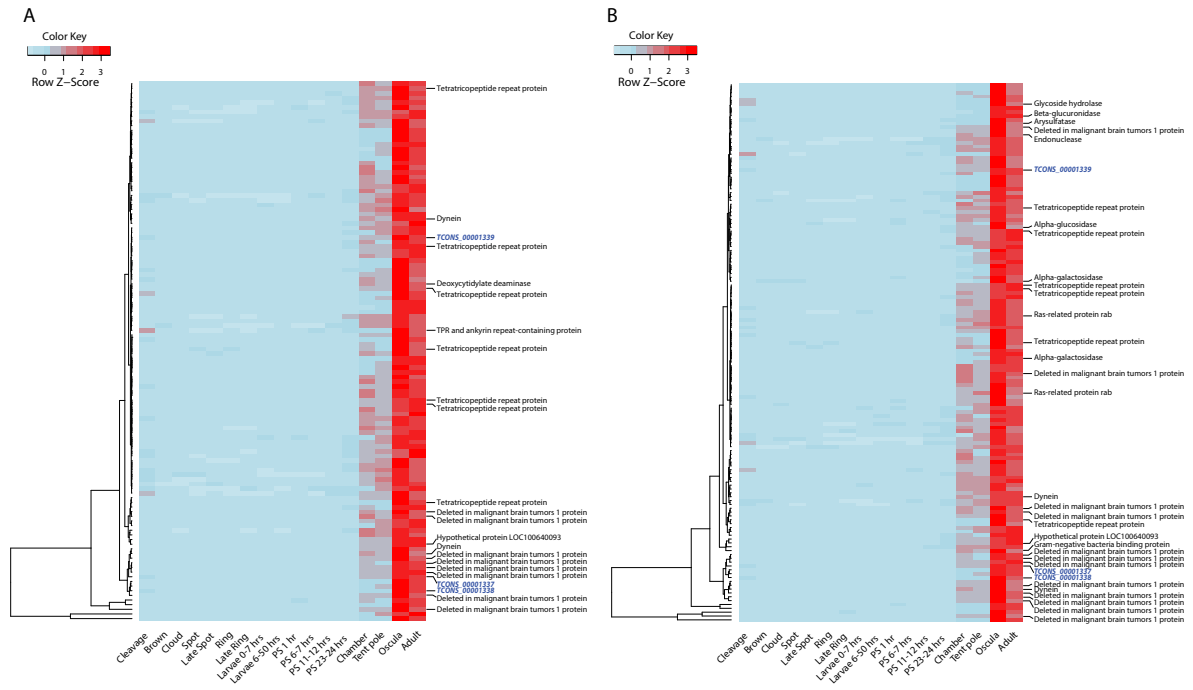

**Supplemental Figure 3** – Developmental expression profiles of two of the six differentially expressed lncRNAs co-expressed with protein-coding genes involved in key metazoan developmental processes. Expression levels were measured by CEL-Seq and rescaled by row. Red indicates high expression level, light blue low expression. Rows corresponding to protein-coding genes with an enriched GO term (Fisher’s exact test,  $p\text{-adj} < 0.05$ ) are shown on the *right*. For a complete list of enriched GO terms and relative protein-coding genes, see Supplemental Table 11. lncRNAs are shown in blue. Both *TCONS\_00001337* (A) and *TCONS\_00001339* (B), as also observed for *TCONS\_00001338* (Fig. 5B), are expressed late in development and are co-expressed with protein-coding genes enriched for scavenger receptor activity, carbohydrate metabolic processes and hydrolase activity.

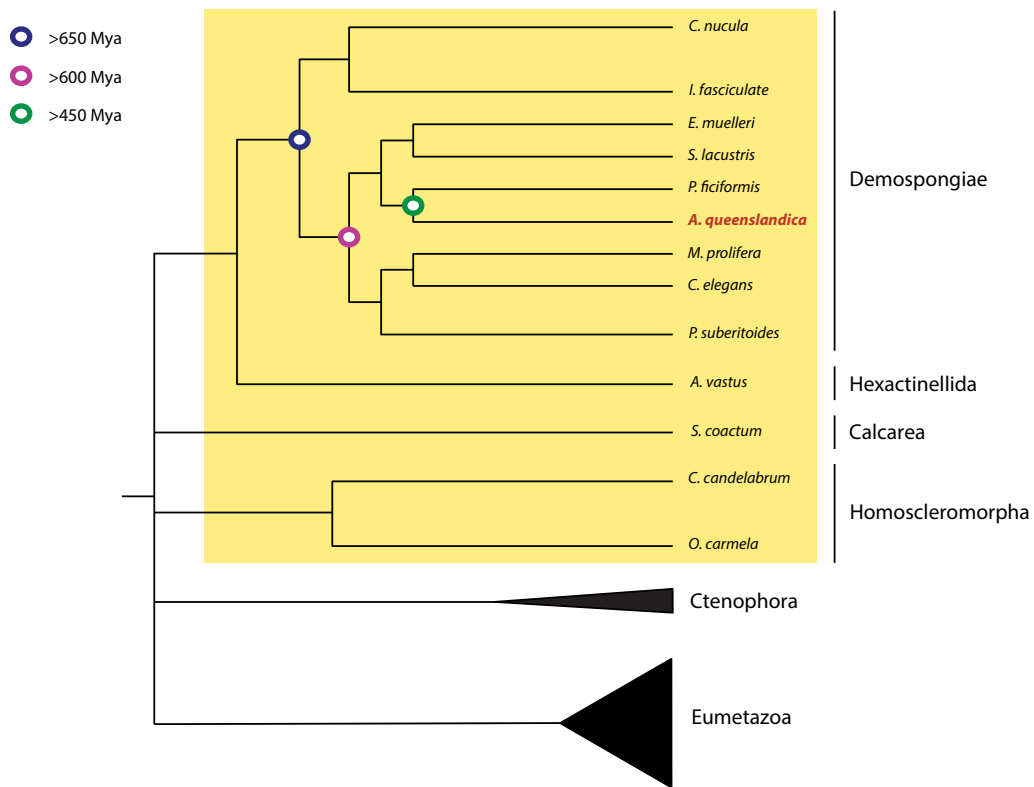

**Supplemental Figure 4** – Schematic representation of the evolutionary relationship among the 13 sponge species used in this study. Yellow box highlights the sponge clade. *Amphimedon queenslandica* is shown in bold red. For detailed phylogenetic relationship analyses of sponges please refer to (Hill et al. 2013) and (Worheide et al. 2012).

## References

Hill MS, Hill AL, Lopez J, et al. 2013. Reconstruction of family-level phylogenetic relationships within Demospongiae (Porifera) using nuclear encoded housekeeping genes. *PloS one* 8: e50437.

R Development Core Team. 2010. R: A language and environment for statistical computing. Vienna, Austria: R Foundation for Statistical Computing.

Worheide G, Dohrmann M, Erpenbeck D, Larroux C, Maldonado M, Voigt O, Borchiellini C and Lavrov DV. 2012. Deep phylogeny and evolution of sponges (phylum Porifera). *Advances in marine biology* 61: 1-78.
